# Supplementary material for: Measurement Matters: Changing Penalty Calculations under the Hospital Acquired Condition Reduction Program (HACRP) Cost Hospitals Millions
Source: bioRxiv or medRxiv preprint supplement (doi:10.1101/2020.10.19.20215194), 2020-10-21
Supplement: Supplementary file [file media-1.pdf]

## **Online Appendix**

Measurement Matters: Changing Penalty Calculations under  
the Hospital Acquired Condition Reduction Program (HACRP) Cost  
Hospitals Millions

**Table A1.** Descriptive statistics of total HAC scores

|         | No data submitted to NHSN implies no Domain 2 score |                                    | No data submitted to NHSN implies maximum Domain 2 score |                                    |                                                 |
|---------|-----------------------------------------------------|------------------------------------|----------------------------------------------------------|------------------------------------|-------------------------------------------------|
|         | Mean (SD)                                           | 75 <sup>th</sup> percentile cutoff | Mean (SD)                                                | 75 <sup>th</sup> percentile cutoff | CMS reported 75 <sup>th</sup> percentile cutoff |
| FY 2018 | -0.06<br>(0.72)                                     | 0.263                              | 0.94<br>(1.12)                                           | 1.999                              | 0.371                                           |
| FY 2017 | 5.72<br>(2.23)                                      | 7.000                              | 7.31<br>(2.56)                                           | 9.400                              | 6.570                                           |
| FY 2016 | 5.91<br>(2.32)                                      | 8.000                              | 7.48<br>(2.35)                                           | 9.250                              | 6.750                                           |
| FY 2015 | 5.85<br>(2.38)                                      | 8.000                              | 7.25<br>(2.31)                                           | 8.950                              | 7.000                                           |

Source: Author's analysis of HCUP administrative data and NHSN HAIs for hospitals in 14 states.

**Figure A2.** Changes in total HAC scores by FY-specific methodology.

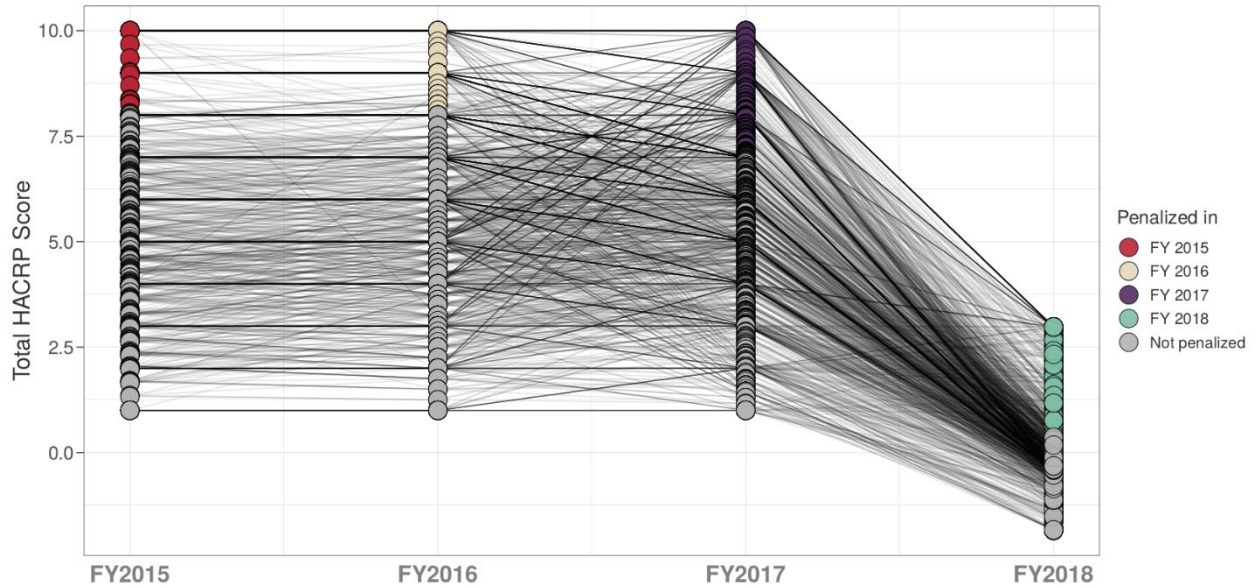

Source: Author's analysis under the assumption that if no HAI data was submitted to NHSN then no Domain 2 score.

Notes: Points in color represent total HAC scores that are greater than the 75<sup>th</sup> percentile of the empirical distribution.

**Figure A3.** Percent overlap in penalized hospitals among FY 2015-2018 scoring methodologies.

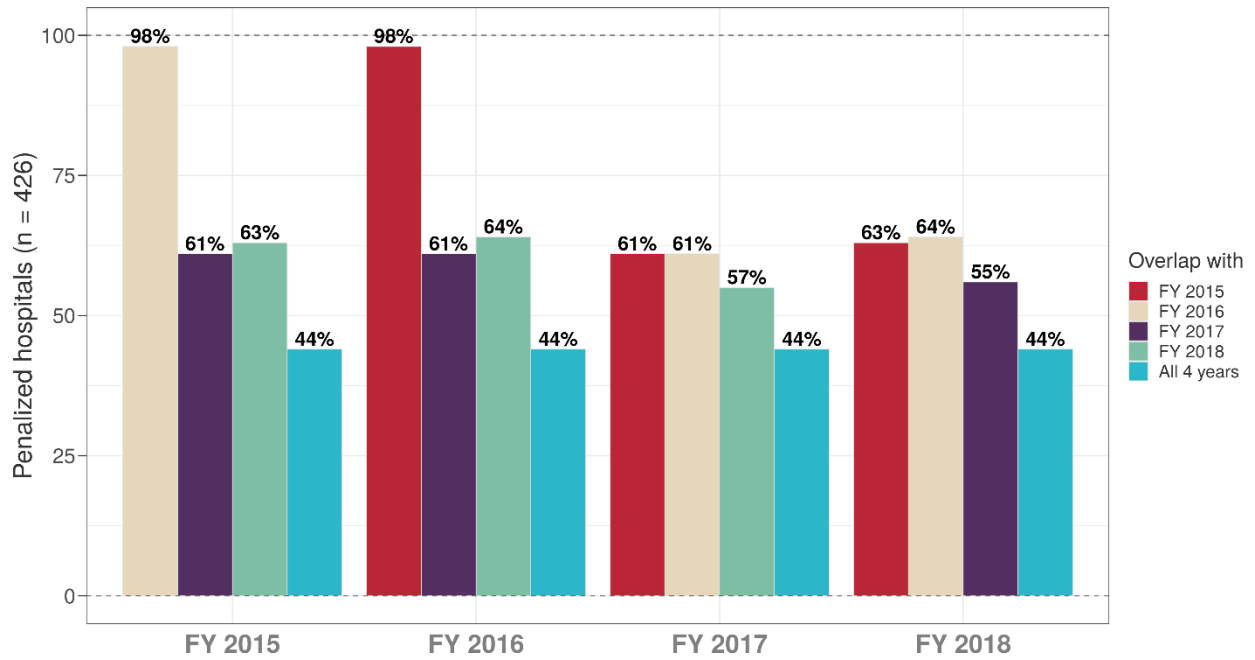

Source: Author's analysis under the assumption that if no HAI data was submitted to NHSN then maximum Domain 2 score.

**Online Exhibit A4.** Changes in total HAC scores by FY-specific methodology.

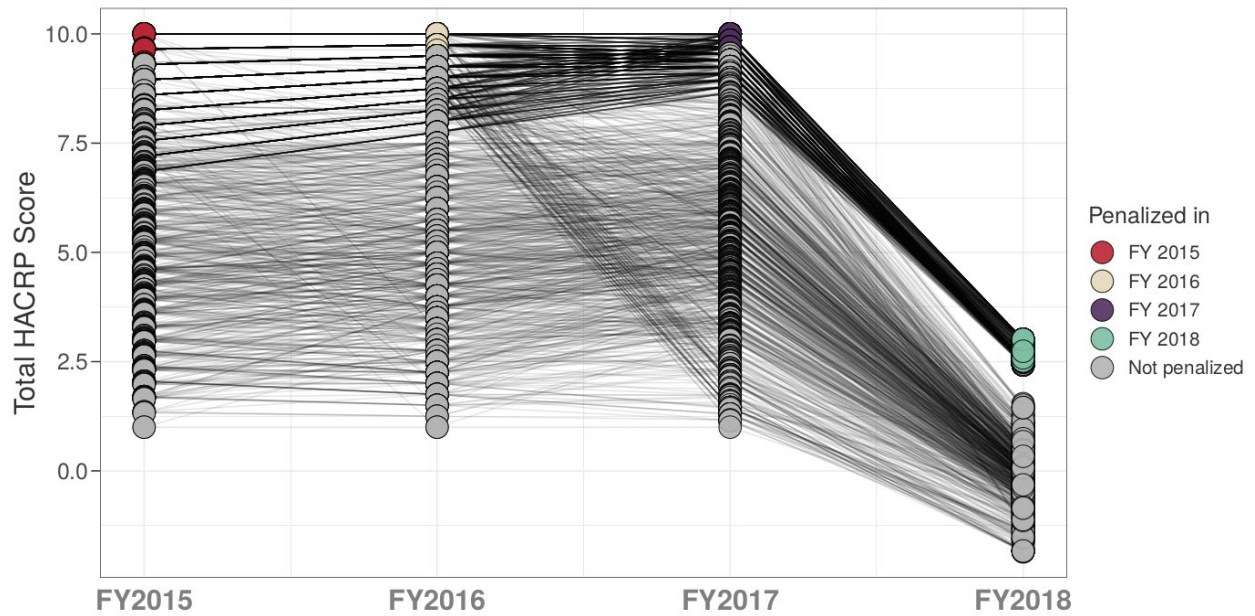

Source: Author's analysis under the assumption that if no HAI data was submitted to NHSN then maximum Domain 2 score.

Notes: Points in color represent total HACRP scores that are greater than the 75<sup>th</sup> percentile of the empirical distribution.
